# Supplementary material for: Targeted Delivery of Neural Stem Cells to the Brain Using MRI-Guided Focused Ultrasound to Disrupt the Blood-Brain Barrier
Source: PubMed Central journal article supplement (PMC3218061; doi:10.1371/journal.pone.0027877), 2011-11-16
Supplement: pone.0027877.s002.pdf [file pone.0027877.s002.pdf]

| <u>Animal</u> | <u>Striatum</u> | <u>Hippocampus</u> |
|---------------|-----------------|--------------------|
| 1             | N/A             | 128%               |
| 2             | N/A             | 119%               |
| 3             | N/A             | 125%               |
| 4             | N/A             | 120%               |
| 5             | 127%            | 118%               |
| 6             | 119%            | 122%               |
| 7             | 118%            | 119%               |
| 8             | 141%            | 128%               |
